# Supplementary material for: Early endocrine disruptors exposure acts on 3T3-L1 differentiation and endocrine activity
Source: PubMed Central journal article supplement — Bioimpacts. 2017 Jun 20;7(2):83–9. doi: 10.15171/bi.2017.11 (PMC5524989; doi:10.15171/bi.2017.11), 2017-06-20
Supplement: bi-7-83-s001.pdf [file bi-7-83-s001.pdf]

## Supplementary data

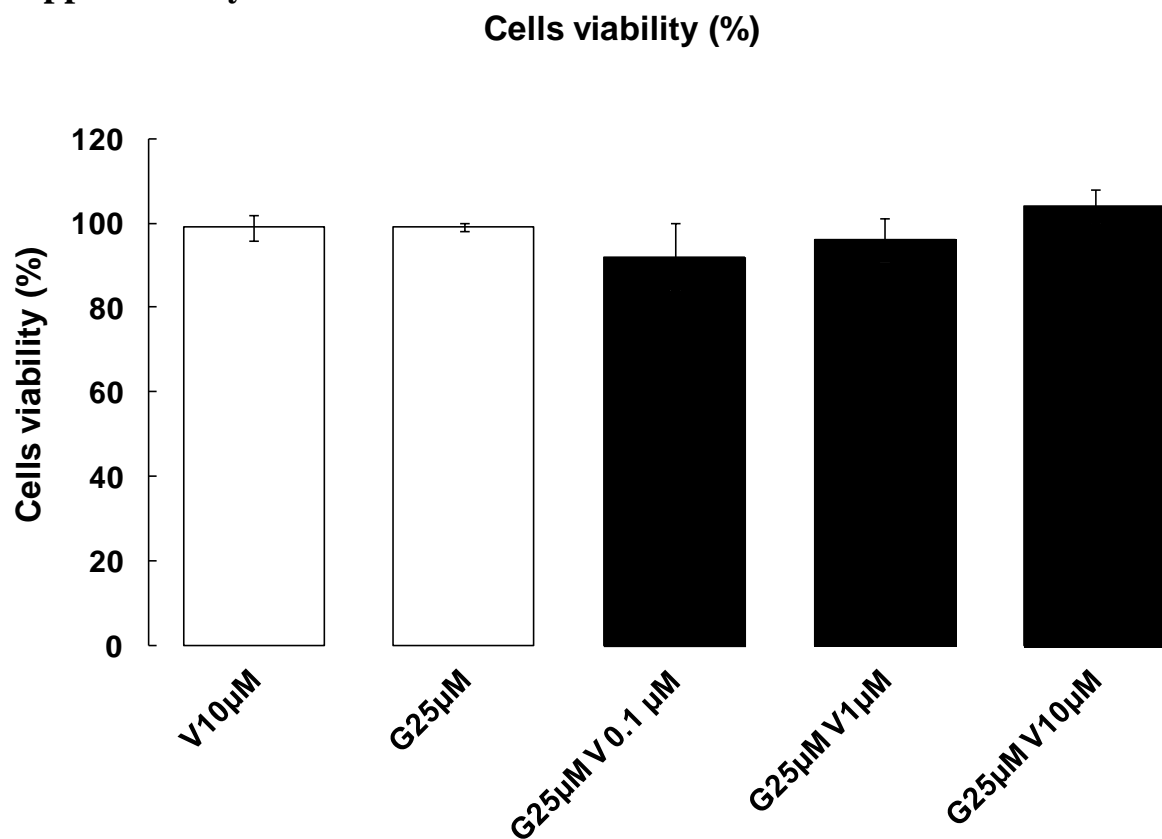

### **Figure S1: Cytotoxicity assay**

Cytotoxicity of G and/or V administered during the induction phase of adipocyte differentiation using neutral red. Results are expressed in (%) of dye released by viable cells compared to DMSO 0.1% group. A compound was considered cytotoxic if the number of viable cells after EDs exposure was less than or equal to 75%. The results are expressed as mean  $\pm$  SEM with 3 independent experiments, measured in triples.
